# Supplementary material for: Enabling the Electrochemical Performance of Maricite-NaMnPO4 and Maricite-NaFePO4 Cathode Materials in Sodium-Ion Batteries
Source: Hindawi journal article supplement (doi:10.1155/2023/6054452), 2023-01-27
Supplement: f1 [file 6054452.f1.docx]

Supplementary Information

1. **Result and Discussion**

The particle size of NaMnPO4 was reduced from 6.29 µm (d50) to 2.12 µm (d50) after 6 h ball milling by the ball mill (High-speed 3D ball mill, MTI) by using 2 mm ZrO2 balls and the distribution of the particle size is more homogeneously. Therefore, it is better to exchange the 2 mm ZrO2 balls with 1 mm balls, rather than extending the milling time to obtain smaller particles. Then the particle size was decreased to 1.15 µm (d50) and 400 nm (d50), respectively after introducing the strong ball milling machine (Pulveristte 7 premium, Fritsch) by 1 mm ZrO2 milling balls.


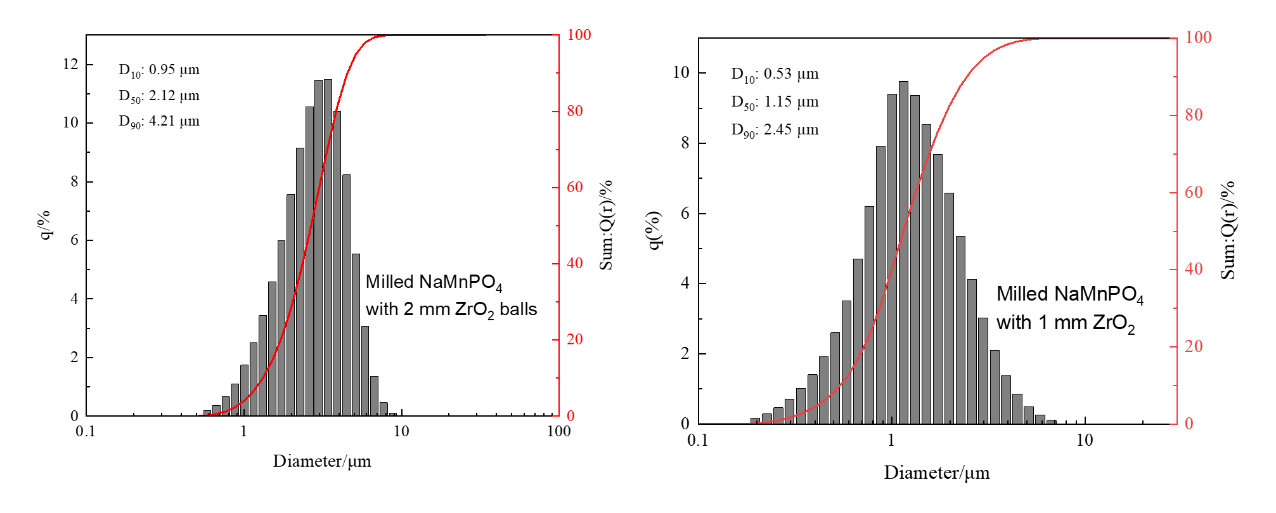


Figure S1: Milled NaMnPO4; a) milled with 2 mm ZrO2 balls, b) milled with 1 mm ZrO2 ball

**
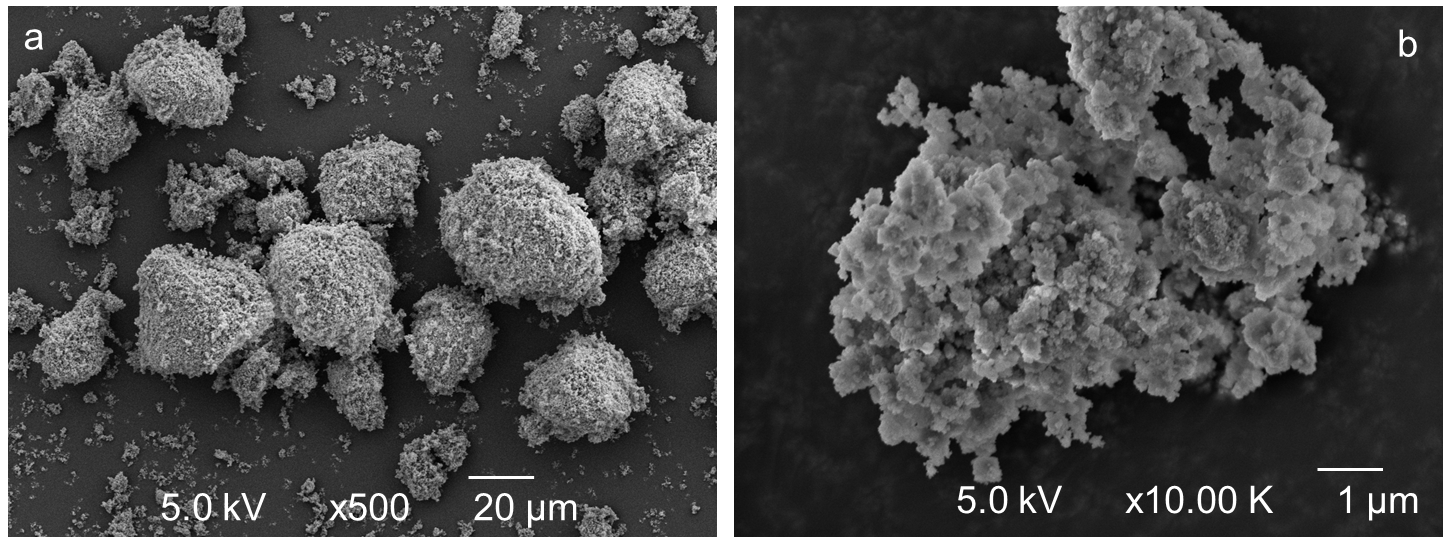
**

Figure S2: SEM image of milled NaMnPO4 (400 nm) without carbon coating at different magnifications

TGA-MS result of m-NaMnPO4 (see figure S3) shows small weight loss at 100 °C which corresponds to moisture present in the material. Beyond, the material does not lose any mass and is thermally stable up to 900 °C and no evolved gas is observed in mass spectrometry, which is a clear indication of a non-volatile transformation.


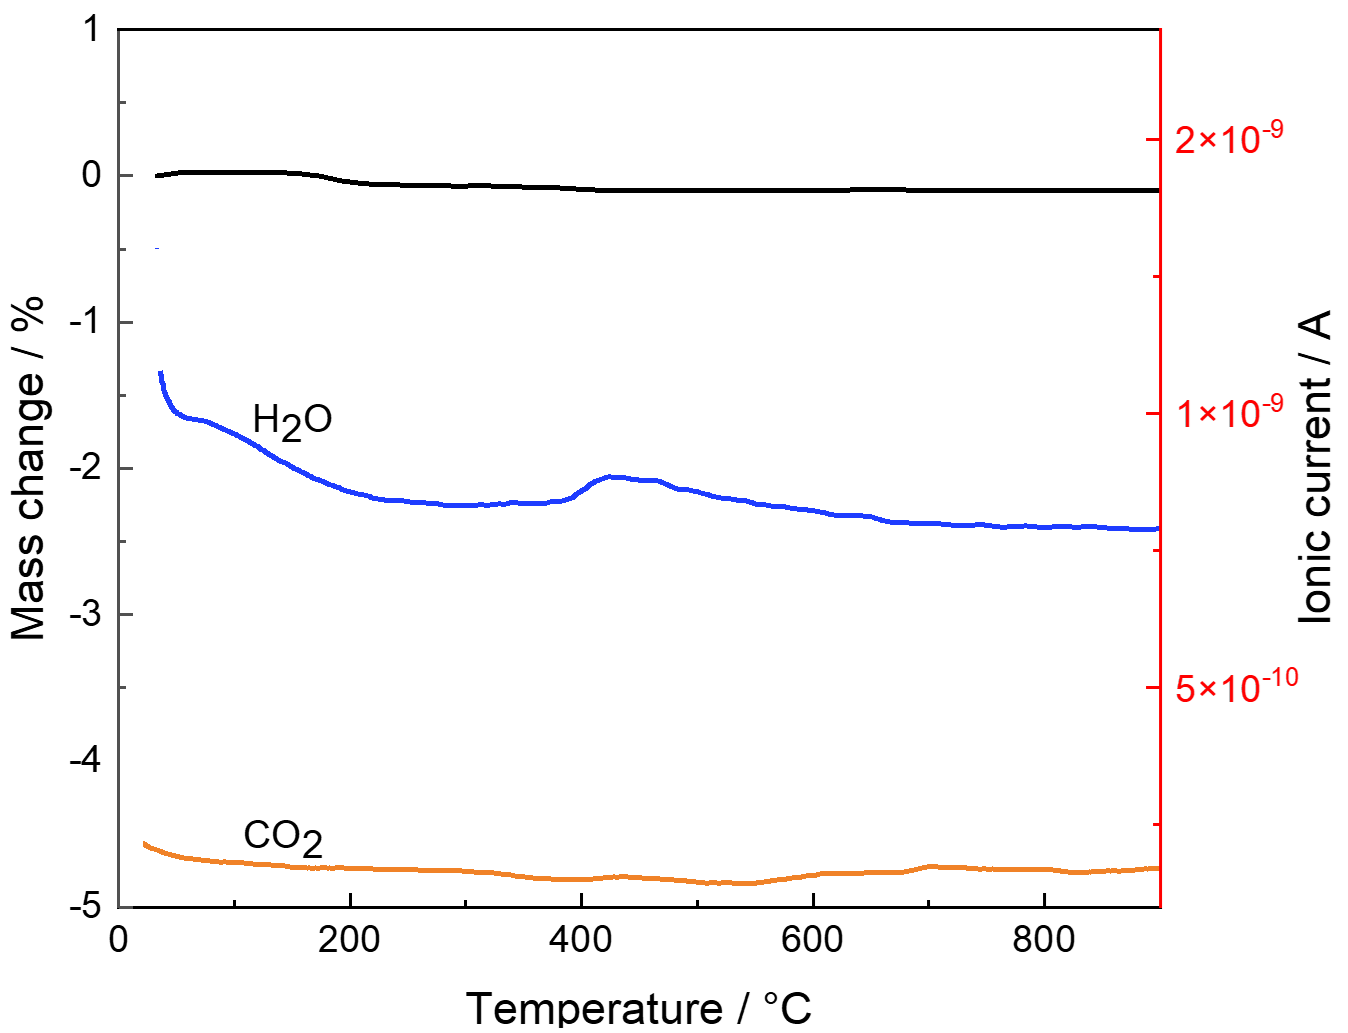


Figure S3: Thermogravimetric plot of m-NaMnPO4 with evolved gases


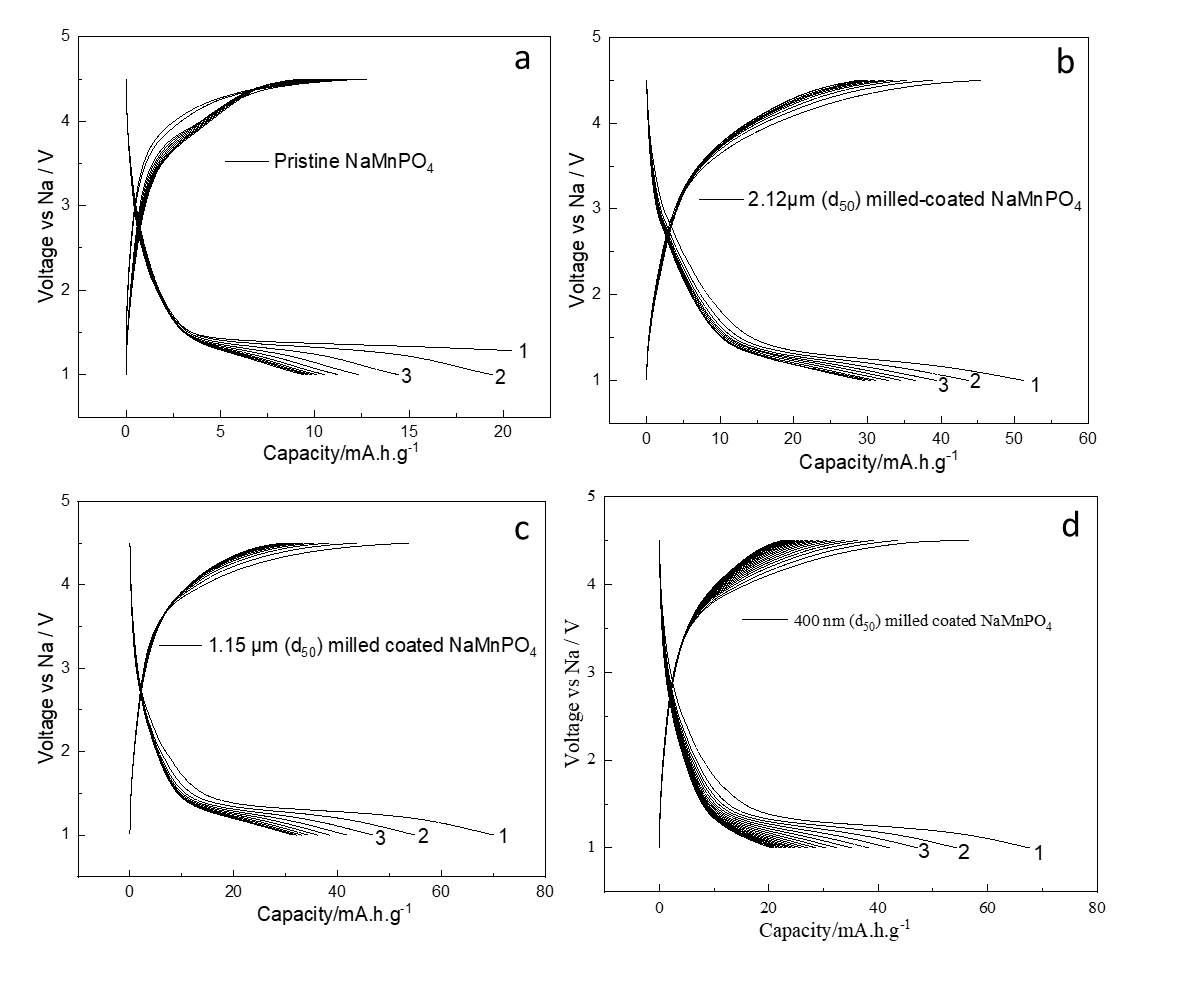


Figure S4: cyclability cycles of NaMnPO4; a) Pristine, b) 2.12 µm milled coated, c) 1.15µm milled coated, d) 400 nm milled coated

In figure S4, the first 20 cycles of pristine, and milled coated NaMnPO4 were shown. It explicitly revealed the capacities incremental by the reduction in particle sizes as well as carbon coating. The initial coulombic efficiencies in all cases were very high and it was more than 100% which dictated the side reaction in initial cycles.

In figure S5 an SEM image of an agglomeration of milled-coated NaFePO4@Cis shown at higher magnification.

**
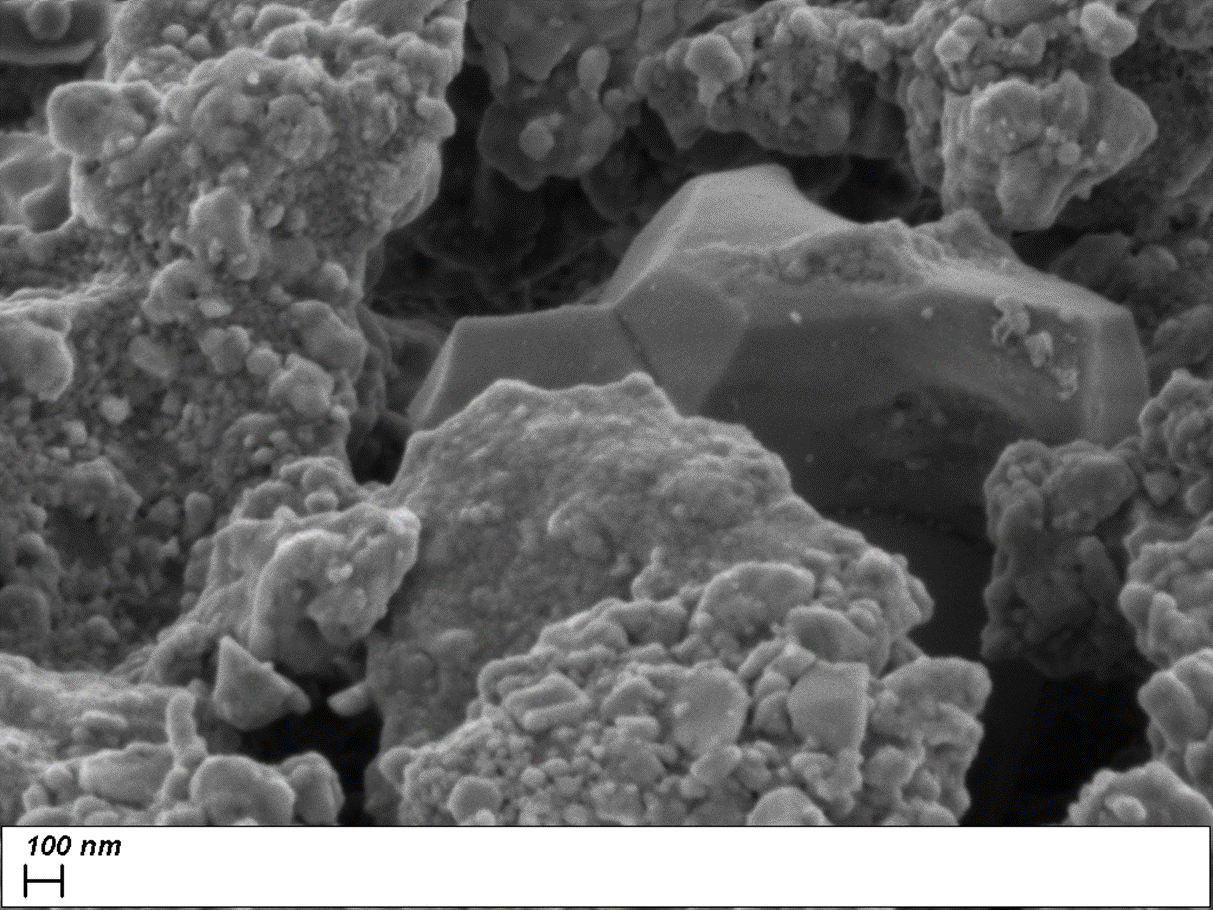
**

Figure S5: SEM image of milled-glucose coated NaFePO4

To analyze whether the phase formation at 600°C of m-NaFePO4 is volatile, TGA is used in conjunction with a mass spectrometer and the resulting curve is shown in figure S6. The material loses very little weight at 100°C, which corresponds to the moisture present in the material. Thereafter, neither material loss nor noticeable outgassing is observed in the mass spectrum. i.e., non-volatile transformation. However, beyond 600°C, a small amount of CO2 starts to evolve.


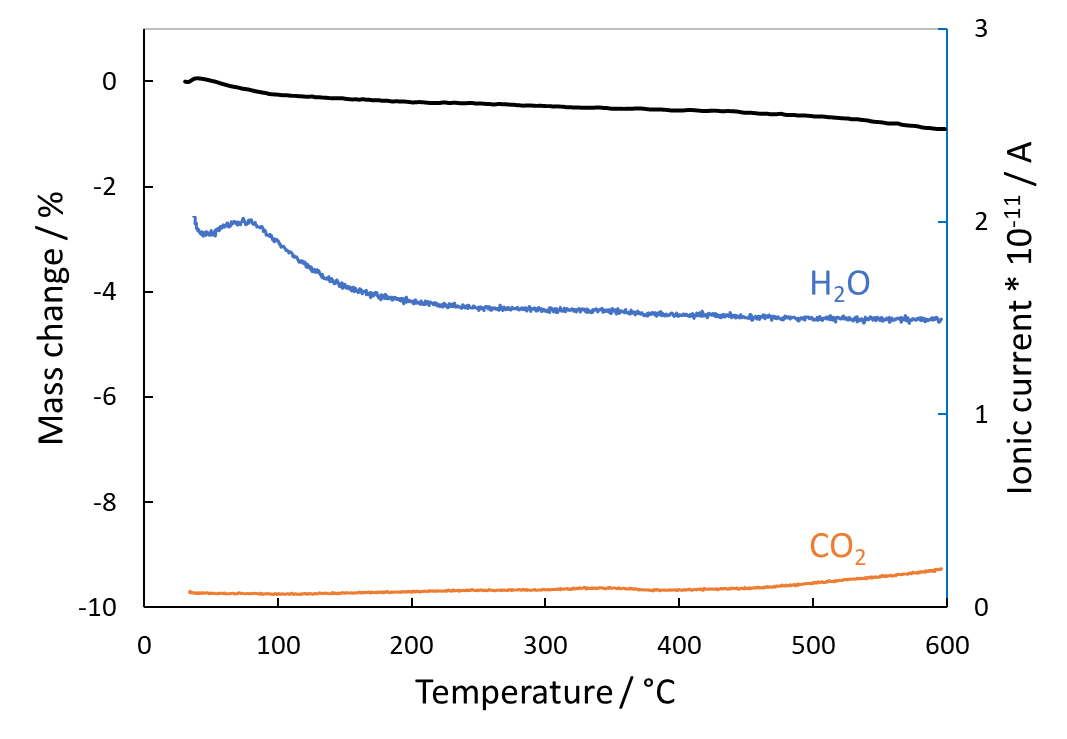


Figure S6: Thermogravimetric plot of m-NaFePO4 with evolved gases


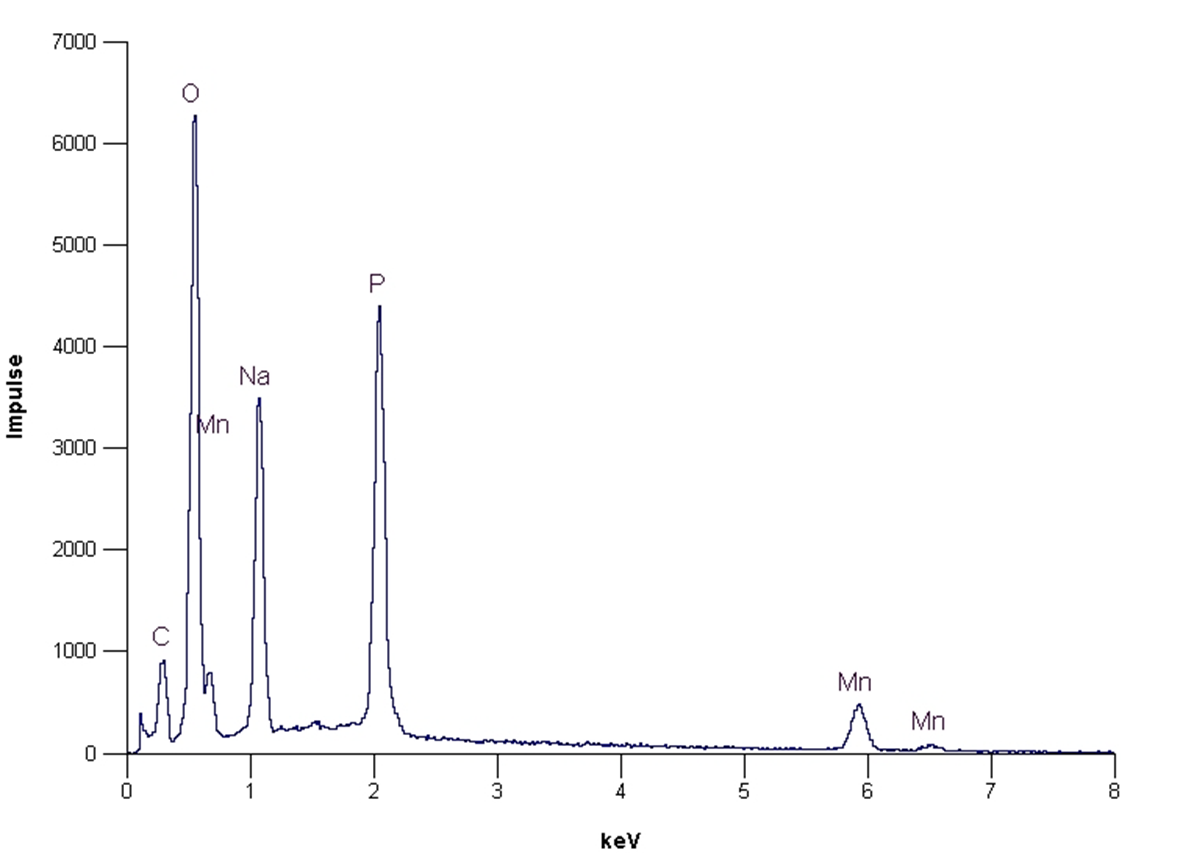


Figure S7: EDX element distribution of NaMnPO4@C


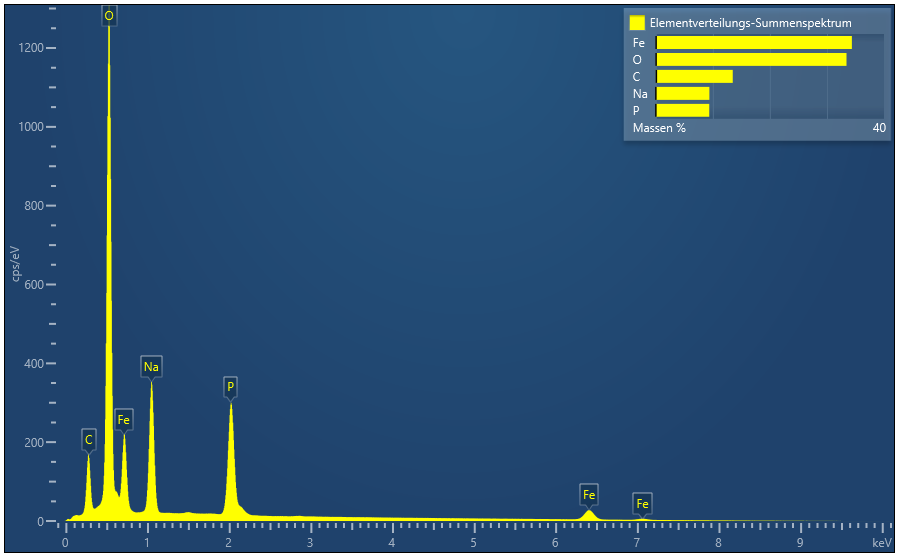


Figure S8: EDX element distribution of NaFePO4@C with glucose coating
